1       **THE FIRST REPORT ON CRYPTOCOCCUS PROFILES OF ISOLATES FROM**  
2       **PATIENTS ATTENDING DR GEORGE MUKHARI ACADEMIC HOSPITAL,**  
3       **SOUTH AFRICA**

4  
5       **Authors Affiliations: Elliot Zwelibanzi Jiyane**<sup>1</sup>; BSc, PGCE, BSc Hons (Med), MSc  
6       (Micro). Sefako Makgatho Health Science University, Oral Health Center, School of  
7       Dentistry, Department of Oral Microbiology, Pretoria, South Africa; email address:  
8       [elliott.jiyane@smu.ac.za](mailto:elliott.jiyane@smu.ac.za)

9       **Mis Leah Nemarude**<sup>2</sup>; BSc, BSc Hons, MSc Viro (Med). Sefako Makgatho Health Science  
10       University, Microbiological Pathology, School of Medicine, Pretoria, South Africa; email  
11       address: [leah.nemarude@smu.ac.za](mailto:leah.nemarude@smu.ac.za)

12       **Prof Maphoshane Nchabeleng**<sup>3</sup>; MBChB, MMed. Sefako Makgatho Health Science,  
13       University Microbiological Pathology, School of Medicine, Pretoria, South Africa; email  
14       address: [maphoshane.nchabeleng@smu.ac.za](mailto:maphoshane.nchabeleng@smu.ac.za)

15  
16       **Corresponding author: Jiyane**<sup>1</sup> ([zwellyelliott@gmail.com](mailto:zwellyelliott@gmail.com))

17       **Mailing address:** Medunsa Campus, PO Box CP30, Sefako Makgatho Health Science  
18       University, 0204

19       **E-mail address:** [elliott.jiyane@smu.ac.za](mailto:elliott.jiyane@smu.ac.za)

20  
21       **ABSTRACT**

22       **Introduction:** Cryptococcosis is a fungal opportunistic infection that is vastly diagnosed  
23       among immune-compromised patients. Reduced susceptibility on commonly used antifungals  
24       is of concern. In the communities served by Dr. George Mukhari Tertiary (DGMT-  
25       Laboratory) Laboratory is not available.

26  
27       **Methodology:** E-test method was used to determine if isolates with reduced susceptibility to  
28       antifungals fluconazole, voriconazole and amphotericin-B had emerged. A multiplex  
29       Polymerase Chain Reaction (PCR) method was used to further identify serotypes that are  
30       circulating at Dr. George Mukhari Tertiary (DGMT-Hospital) Hospital.

31  
32       **Results:** E-test strips were interpreted as resistance, intermediate or susceptible in relation to  
33       each serotype identified. Of the 50 incident isolates tested, 100% were inhibited by both  
34       voriconazole and amphotericin-B. Fluconazole was resistance to 50% of incident isolates.

35  
36       **Conclusion:** *C. neoformans* serotype A is the predominant serotype in the area served by  
37       DGMT-Laboratory, accounting for 96% of the isolates. It is important for public health to  
38       continuously monitor resistance emergence.

39  
40       **Keywords:** cryptococcosis, serotypes

41  
42  
43  
44  
45  
46  
47  
48  
49  
50  
51  
52  
53  
54  
55  
56  
57  
58  
59  
60  
61  
62  
63  
64  
65  
66  
67  
68  
69  
70  
71  
72  
73  
74  
75  
76  
77  
78  
79  
80  
81  
82  
83  
84  
85  
86  
87  
88  
89  
90

## BACKGROUND

Cryptococcosis is amongst the leading and life-threatening opportunistic infection<sup>[1]</sup>. The disease is caused by *Cryptococcus neoformans* (*C. neoformans*) and *Cryptococcus gattii* (*C. gattii*), which are vastly diagnosed among immune-compromised patients<sup>[2]</sup>. Mainly *C. neoformans*, with three recognized serotypes which are acknowledged as serotype A, serotype D and the hybrid-AD<sup>[3]</sup>. Previously, these serotypes were identified and differentiated by the phenotypic approach<sup>[4]</sup>. Lately, are identified by PCR assays<sup>[5]</sup>. More methods of molecular assays are used to classify *C. neoformans* serotypes<sup>[6]</sup>. The classification is based on antigenic metamorphoses in the polysaccharide capsule associated with virulence factors<sup>[3,7]</sup>. Prevalently found circulating globally is serotype A, whereas serotype D and AD hybrid circulating in truncated numbers<sup>[1-3]</sup>. Serotype A account for more than 90% cases of cryptococcosis in South Africa owing to the extraordinary occurrence of HIV/AIDS<sup>[2,8,9,10]</sup>.

To treat cryptococcosis, the most widely used antifungal agents are amphotericin-B, flucytosine, voriconazole and fluconazole<sup>[9,11]</sup>. Amphotericin-B is used as the first line treatment but limited by toxicity that requires laboratory monitoring, voriconazole is limited to private sectors in Africa<sup>[9-12]</sup>. The amalgamations of antifungals are recommended for induction but flucytosine is not available in resource-poor countries<sup>[12]</sup>. Unfortunately, these are countries with a high incidence of cryptococcosis<sup>[10-12]</sup>. All these antifungals are also limited by emerging resistance mechanisms such as the antigenic polysaccharide capsule tolerance, the mating gene types, the acid tolerant abilities, and spores switching<sup>[12]</sup>. Globally, 20–58% of resistance cases are reported on cryptococcosis by means of diverse studies, focusing on fluconazole<sup>[8-</sup>

91<sup>10,13,14]</sup>. Emerging resistance on the other  
92 cryptococcosis antifungals was not  
93 reported<sup>[9,15]</sup>. Furthermore, intrinsic and  
94 acquired resistance mechanisms are all  
95 associated with Cryptococci and the drugs  
96 proneness to those resistance  
97 mechanisms<sup>[12,16-18]</sup>.  
98  
99 The widespread use of fluconazole may  
100 lead to the emergence of reduced  
101 susceptibility<sup>[19,20]</sup>. Thus the development  
102 of resistance to fluconazole is devastating  
103 to the treatment of cryptococcosis, and it is  
104 necessary to know if there is cross-  
105 resistance with voriconazole which could  
106 be an alternative agent. It is important for  
107 institutions to monitor for changes in  
108 susceptibility profiles of isolates  
109 circulating in their areas in order to update  
110 the treatment regimens. Our aim in this  
111 study was to identify circulating serotypes  
112 and determination of the susceptibility  
113 profiles of *Cryptococcus* isolates to  
114 fluconazole, voriconazole and  
115 amphotericin-B antifungals form clinical  
116 specimens sent to the DGMT-Hospital  
117 NHLS.

## METHODS

**Ethical consideration:** Ethics were sorted from Medunsa Research Ethics Committee. Permission to obtain isolates was sorted from the DGMTL and NHLS managers. Clinical isolates were delinked from identifiers to ensure confidentiality.

**Sample size:** Epi Info version 3.5.3 (Centre for Disease Control and Prevention) was used to calculate the sample size. The required sample size in this study was 50. This was calculated at an estimated frequency of 50%, power of 80% and the confidence interval of 95%.

**Demographics:** Demographic data including age, sex and clinical diagnosis of patients from whom the isolates were isolated was obtained from the Laboratory Information Systems (LIS) in the laboratory.

140 **Collection and storage of isolates:** 177  
141 Clinical isolates were conveniently 178  
142 collected from the laboratory after 179  
143 processing for patient management was 180  
144 completed. The isolates were collected 181  
145 from February-July 2014, on a day to day 182  
146 basis until the sample size was reached. 183  
147 These isolates were already identified by 184  
148 the NHLS as *Cryptococcus* and stored in a 185  
149 - 4°C fridge. 186

150  
151 **Sub-culture of isolates:** The stored 188  
152 isolates were sub-cultured on Sabouraud 189  
153 dextrose agar (SDA) plate as described by 190  
154 Govender et al. 2011<sup>[9]</sup>. 191

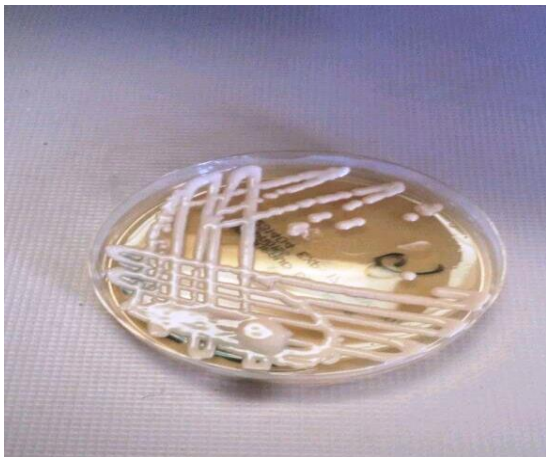

155  
156 **Figure 1:** Muroid colonies on SDA  
157 medium

158  
159 **Confirmation and identification of** 208  
160 ***Cryptococcus*:** Gram staining was done to 209  
161 confirm the morphology of yeast cell 210  
162 according to Chayakulkeeree (2007) 211  
163 description<sup>[21]</sup>. India ink (negative stain) 212  
164 was done as described by Ogundeji (2013) 213  
165 to verify the presence of capsule<sup>[22]</sup>. The 214  
166 isolates were further inoculated to urease 215  
167 broth media test in a slant position as a 216  
168 confirmation test according to Gazzoni 217  
169 (2014) methods<sup>[23]</sup>. 218

170 **Susceptibility Testing:** After sub-culturing 220  
171 on SDA (**Figure 1**), susceptibility testing 221  
172 was achieved according to Clinical and 222  
173 Laboratory Standards Institution (CLSI) 223  
174 outlines of 2007<sup>[24]</sup> and as described by 224  
175 Govender et al. 2011, 2013<sup>[9,25]</sup>. 225  
176

177 **DNA Extraction and Sample Preparation**  
178 **for Multiplex PCR:** Genomic DNA was  
179 extracted from the clinical isolates using  
180 the commercial kit (ZR fungal/bacterial  
181 DNA MiniPrep kit) in accordance with the  
182 manufacturer's instructions (Zymo  
183 research group). The kit has been  
184 optimized for removal of PCR inhibitors  
185 and maximal recovery of pure DNA  
186 without RNA contamination. The  
187 extraction of DNA from the isolates was  
188 done using the protocol, "Biological  
189 liquids and cell suspensions"<sup>[26]</sup>. 190

191 **Primers selection:** The primers used were  
192 synthesized by Inqaba Biotechnical  
193 Industries (Pty) Ltd, Muckleneuk, and  
194 Pretoria. The serotypes specific primers  
195 were designed to target the Mating -  $\alpha$   
196 gene and Mating - a gene of both serotypes  
197 A and D<sup>[27]</sup>. Primers targeting for genes  
198 confirming *C. neoformans* serotypes are  
199 listed in **table 3**. 200

201 **Amplification of genes:** This was done on  
202 the extracted DNA using specific primers  
203 (**Table 3**). Two master-mixtures (MM)  
204 were prepared. Reagents were obtained  
205 from Bioline Meridian Life Science  
206 Company (UK), each PCR assay was set-  
207 up with nuclease-free water as the negative  
208 control (Bioline, UK), and positive  
209 controls were not included due to financial  
210 constraints. MyTaq™ HS DNA-  
211 Polymerase (Bioline, UK) was used in the  
212 PCR reactions. 213

214 For each sample, a 50  $\mu$ l reaction MM was  
215 prepared following the manufacturer's  
216 instructions (Bioline, UK). 217

218 Briefly: 10  $\mu$ L x MyTaq™ HS buffer, 1  
219  $\mu$ L of each of 2 primers, 5  $\mu$ L of the  
220 template, 0.5  $\mu$ L MyTaq™ HS DNA-  
221 Polymerase (Bioline, UK) (5 U/ $\mu$ L), and  
222 32,5  $\mu$ L nuclease-free water. Two sets of  
223 MM were used, in MM1 contained alpha-  
224 Aa-D primer set and the MM2 contained  
225 a-Aalpha-D. The 0.2 mL PCR tubes each  
226 containing 50  $\mu$ L placed into a reaction

227 was allowed to take place in a GeneAmp  
228 PCR System 9700 (MTHE 01326 PE  
229 Applied Biosystems) thermocycler for 3  
230 hours; succeeding PCR temperatures as  
231 described by Saiki (1999)<sup>[28]</sup>.

232  
233 **Detection of amplified products:**  
234 Electrophoresis was performed on all  
235 samples using 2,0% agarose gel (Crystal  
236 TBE, Bioline, UK) for 40 minutes at 100  
237 V, with ethidium bromide and UV  
238 transilluminator (Gel Doc™ EZ System).  
239 The 1 kb molecular weight marker  
240 (HyperLadder IV, Bioline, UK) was used  
241 in together with the amplified products.  
242 The photographic copy was taken using a  
243 Gel Doc EZ imager and the results were  
244 recorded as representative of serotype-A $\alpha$ ,  
245 D $\alpha$  or A-a, D-a genes. For expected bands  
246 see **table 3**.

247  
248 **Capturing of data:** Microsoft Excel  
249 (Microsoft Office, 2010) was used to  
250 analyze data and the captured data was  
251 double-checked to ensure reliability; Epi  
252 Info version 3.5.3 (Centers for Disease  
253 Control & Prevention). Descriptive  
254 statistical analysis was performed based on  
255 ANOVA excel, 2010. Measures of central  
256 tendency and dispersion were calculated  
257 for continuous variables (e.g. age);  
258 frequencies and proportions of categorical  
259 data (e.g. serotypes) were calculated.

260  
261 **Reliability, Validity, and Objectivity:** All  
262 tests were performed according to  
263 recognized, accredited standard operating  
264 procedures as well as to the instructions of  
265 the manufactures in the case where  
266 commercially available kits were used.  
267 Molecular size markers were used during  
268 agarose gel electrophoresis.

269  
270

## RESULTS

271 **Study population:** There were 50  
272 *Cryptococci* isolates collected from  
273 different clinical specimens sent to the  
274 DGMT-Laboratory during the study  
275 period, June to October 2014 (5 months).

276 Eleven (22%) isolates were from blood  
277 specimens and 39 (78%) from Cerebral  
278 Spinal Fluid (CSF).

279

280 **Table 1: Demographics of the patients:**  
281 Only 41 of the 50 patients from where the  
282 clinical specimens were sent had complete  
283 information from the laboratory  
284 information system.

285

286

| Females  | Males    | Unknown |
|----------|----------|---------|
| 30 (60%) | 11 (22%) | 9 (18%) |

287 The ages of the 41 patients analyzed  
288 ranged from 15 to 86 with the majority  
289 being between 35 and 45.

290

291 **Biochemical test for species:** Urease slope  
292 was done to all 50 isolates. After a period  
293 of 24 hours incubation at 30°C, the color  
294 change was observed. The change of  
295 colorless broth to pink broth medium was  
296 confirming the presence of *C. neoformans*  
297 species (**figure 2**).

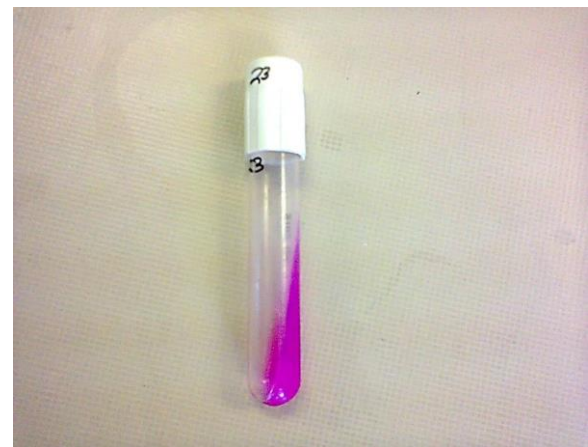

298

299 **Figure 2: Urease slope of one of the**  
300 **isolates showing a colour change after**  
301 **24 hours incubation.**

302

303 **Susceptibility testing:** After the incubation  
304 period of the three antifungals E-test strips  
305 (bioMérieux S.A., Marcy l'Etoile, France)  
306 which were fluconazole, voriconazole, and  
307 amphotericin-B, results were then read  
308 following the CLSI<sup>[24]</sup>. The Minimum  
309 inhibitory concentration (MIC) values  
310 were read at the point of intersection  
between the zones of growth and the edge

311 of the strip. The amphotericin-B was read  
 312 at the point of complete inhibition (100%)  
 313 as shown in **figure 3**, both fluconazole and  
 314 voriconazole MICs were read at a point of  
 315 significant inhibition of growth, about  
 316 80% reduction of growth as shown in  
 317 **figure 4** and **5a-b**. MIC values were  
 318 documented on a data collection sheet. The  
 319 MIC values for fluconazole and  
 320 voriconazole were interpreted in  
 321 accordance with CLSI updated M27  
 322 breakpoints (2013) guideline and for  
 323 amphotericin B, according to NCCLS M27  
 324 guideline<sup>[24]</sup>. These were interpreted as  
 325 susceptible, intermediate and resistant.

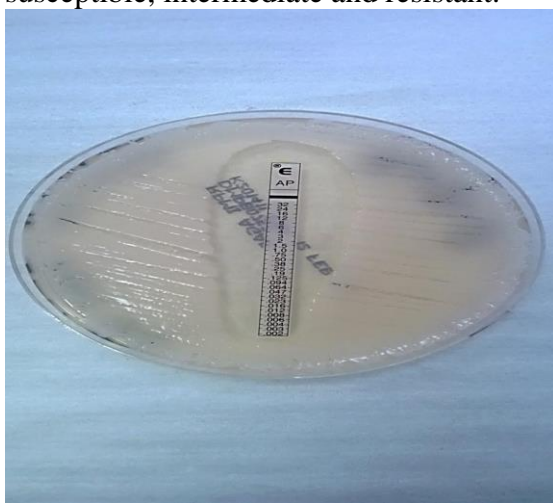

326  
 327 **Figure 3: Amphotericin-B point of**  
 328 **100% inhibition of growth**  
 329

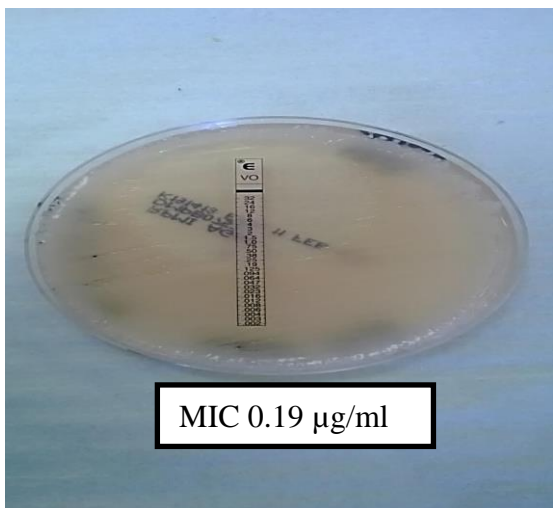

330  
 331 **Figure 4: Voriconazole point of 80%**  
 332 **inhibition of growth**  
 333

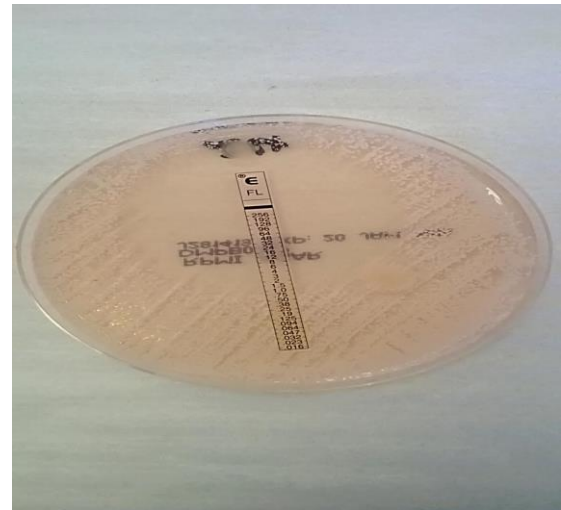

334  
 335 **Figure 5a: Fluconazole point of 80%**  
 336 **inhibition of growth**

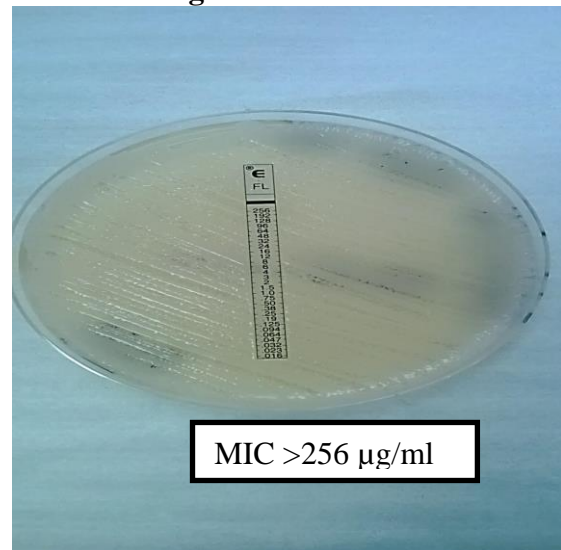

337  
 338 **Figure 5b: Fluconazole point of 0%**  
 339 **inhibition of growth**

340  
 341 The MICs were determined in all isolates.  
 342 Voriconazole and amphotericin-B were  
 343 susceptible to all isolates as presented in  
 344 **table 4** above.

345  
 346 **Table 2: Molecular confirmation of**  
 347 **serotypes:** PCR for serotyping of *C.*  
 348 *neoformans* was performed on all 50  
 349 isolates.

| Master-mix 1 (MM1) |     |                    | Master-mix 2 (MM2) |             |                    |
|--------------------|-----|--------------------|--------------------|-------------|--------------------|
| Serotypes          |     |                    |                    |             |                    |
| A- $\alpha$        | D-a | AD- $\alpha\alpha$ | A-a                | D- $\alpha$ | AD- $\alpha\alpha$ |
| 48(96%)            | -   | -                  | -                  | 2(4%)       | -                  |

350 The agarose gel picture below, show  
351 representatives of PCR results on an  
352 agarose electrophoresis

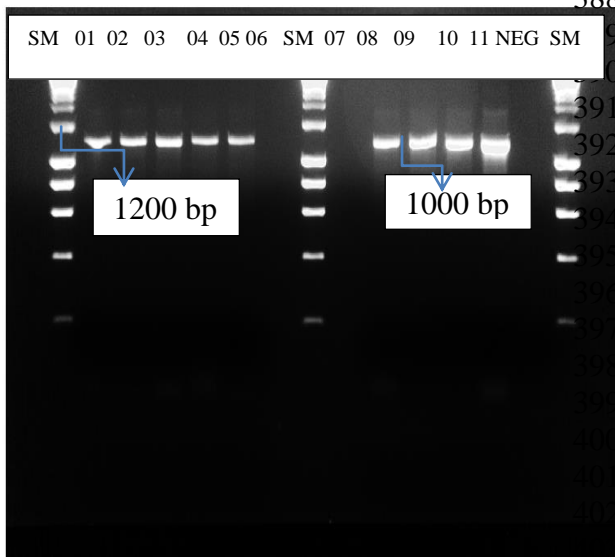

353  
354 **Figure: Representative Agarose gel**  
355 **electrophoresis.** Where: Lane 1-11:  
356 Clinical isolates; Neg: Negative control;  
357 SM: 1000 bp (1 kd) (size markers); Lane  
358 number: 2-5; 8-11 represent serotype A $\alpha$   
359 mating genes; Lane number: 6-7 negative  
360 results.

## 362 DISCUSSION

363 Resistance to antifungal agents used  
364 against cryptococcosis is globally  
365 reported<sup>[9,16,29-31]</sup>. In Africa, cryptococcosis  
366 epidemiology data is scarce but  
367 accumulated evidence in South Africa,  
368 makes it apparent that resistance  
369 development to commonly used antifungal  
370 agents is of concern<sup>[8-10,25]</sup>. Therefore,  
371 monitoring the susceptibility of these  
372 commonly used antifungal agents in  
373 different geographical areas is essential.

374  
375 Data on circulating serotypes responsible  
376 for cryptococcosis in communities served  
377 by DGMT-Laboratory is not available.  
378 This study serves to profile the  
379 susceptibility and to identify the  
380 circulating serotypes of *Cryptococcus* at  
381 DGMT-hospital, in South Africa.

382  
383 Based on our study, the susceptibility of  
384 the amphotericin-B, fluconazole, and

385 voriconazole was profiled; resistance to  
386 fluconazole was of foremost concern  
387 (**table 4**).

388  
389 It was not surprising to see that half of our  
390 isolates were completely resistant to  
391 fluconazole. Our results were in keeping  
392 with multiple studies of diverse geographic  
393 areas, such that Arsenijevic et al (2014) in  
394 Serbia revealed 60% resistance of clinical  
395 isolates<sup>[32]</sup>, and that of 63% by Favalessa  
396 et al (2014) in West Brazil patients<sup>[33]</sup>.  
397 Furthermore, a South African report of  
398 Govender et al (2011) and (2013) showed  
399 58% resistance to fluconazole<sup>[9,25]</sup>.

400 Fluconazole resistance is based on the *C.*  
401 *neoformans* mechanisms of action<sup>[8,16,-18]</sup>.  
402 The other factors that contribute to the  
403 recurrence of cryptococcosis among South  
404 African patients are limited access to  
405 treatment and inadequate treatment<sup>[8-10,25]</sup>.

406  
407 Furthermore, isolates of our study were  
408 highly susceptible to voriconazole and  
409 amphotericin-B. Our findings were not  
410 different but comparable to the studies of  
411 Arsenijevic *et al* (2014)<sup>[32]</sup>, Govender *et al*  
412 (2011) and (2013), they all reported 100%  
413 susceptibility on voriconazole and  
414 amphotericin-B<sup>[9,25]</sup>. There was no cross-  
415 resistance between amphotericin-B,  
416 voriconazole, and fluconazole on in-vitro  
417 testing. It will, however, be important to  
418 assess this based on clinical outcome in  
419 patients.

420  
421 Unfortunately, Amphotericin-B had no  
422 breaking-points according to CLSI  
423 updated M27 break-points document of  
424 2013, we, therefore, interpreted our results  
425 in accordance with NCCLS M27-A  
426 guideline document (NCCLS M27-A  
427 guideline, 2000)<sup>[24]</sup>. Fortunately Govender  
428 *et al* (2011) also, however, indicated the  
429 challenges of performing susceptibility  
430 testing for amphotericin-B because of the  
431 absence of CLSI break-points<sup>[9]</sup>.

434 Molecular-based, our study confirmed that  
435 *C. neoformans* serotype A is predominant  
436 in our setting. Accumulated evidence  
437 showed that serotype A has been reported  
438 as more virulent and prevalent than the  
439 other serotypes<sup>[32-36]</sup>. Likewise, Lugarini et  
440 al (2008) in Brazil, reported a prevalence  
441 of 53% serotype A  $\alpha$ -mating gene types  
442 circulating across the country<sup>[34]</sup>. A similar  
443 study by Favalessa et al (2014) in Midwest  
444 Brazil also reported serotype A making  
445 63% of the isolates from HIV/AIDS  
446 patients<sup>[33]</sup>. Khayhan et al (2013) also  
447 confirmed serotype A as the most  
448 prevalent serotype in Asia Phayoa<sup>[35]</sup>. In  
449 our study, we didn't manage to find the  
450 HIV status of our patients. Our study was  
451 in keeping with a systemic review study of  
452 Litvintseva et al (2011) which was  
453 conducted in African countries, reported  
454 serotype A specifically the  $\alpha$ -mating gene  
455 types to account for 79% of the isolates<sup>[36]</sup>,  
456 and according to our study in South  
457 Africa, serotype A is the commonest  
458 circulating serotype across our setting,  
459 counting for 96%  $\alpha$ -mating gene types.

460 Furthermore, our study showed that only a  
461 few isolates were confirmed to be serotype  
462 D  $\alpha$ -mating genes type. Those few isolates  
463 were from patients over the age of 65.  
464 Duke University in Durham previously  
465 reported that serotype D is very rare and  
466 less information is documented about the  
467 distribution of this serotype<sup>[37]</sup>, whereas  
468 Feretzaki et al (2014) in India reported that  
469 serotype D requires very high inoculum to  
470 disseminate and cause infections like  
471 meningitis<sup>[38]</sup>. There is no information or  
472 data documented about the distribution of  
473 serotype D  $\alpha$ -mating gene-types in South  
474 Africa and in our setting. Our two patients  
475 could have been more immune-  
476 compromised than the others because of  
477 their age. Furthermore, no study has been  
478 conducted according to our knowledge on  
479 serotypes and mating-genes in South

480 Africa, Pretoria, DGMT-Hospital. Our  
481 results highlight the importance of  
482 properly treating cryptococcosis.

## 483 CONCLUSION

484 *C. neoformans* serotype A is a  
485 predominant serotype in the area served by  
486 DGMT Laboratory, accounting for 96% of  
487 the isolates. Fifty percent of the isolates  
488 were resistant to fluconazole while 100%  
489 of those tested were susceptible to  
490 voriconazole and amphotericin-B,  
491 suggesting a lack of cross-resistance on in-  
492 vitro testing.

493 The study had several limitations such as  
494 low population number and financial  
495 constraints. However, because of high  
496 fluconazole resistance suggested, the study  
497 recommends the routine performance of  
498 susceptibility testing to fluconazole. Cross-  
499 resistance with voriconazole and  
500 amphotericin-B is to be evaluated further.

## 501 Acknowledgments

502 We thank NHLS for assisting with isolates  
503 collections, and VLIR for reagents.

## 504 Conflict of Interest

505 The authors declare no conflicts of interest  
506 with respect to authorship and/or  
507 publication of this article.

## 508 Author Contributions

509 Conceived and designed the experiments:  
510 EZ Jiyane. Performed the experiments: EZ  
511 Jiyane, Analysed the data: EZ Jiyane,  
512 Contributed reagents/materials/analysis  
513 tools: VLIR, EZ Jiyane; Contributed to the  
514 writing of the manuscript: EZ Jiyane;  
515 critically reviewed the manuscript: EZ  
516 Jiyane, L Nemarude, Prof M Nchabeleng.

## 517 Funding sources

518 All funds were received from VLIR.

525

526

527

## REFERENCES

- 528  
529 1. Limper AH, Adenis A, Le T, Harrison  
530 TS. Fungal infections in HIV/AIDS.  
531 The Lancet Infect Dis. 2017;  
532 17(11):e334-43.  
533 [https://doi.org/10.1016%2Fs1473-](https://doi.org/10.1016%2Fs1473-3099%2817%2930303-1)  
534 [3099%2817%2930303-1](https://doi.org/10.1016%2Fs1473-3099%2817%2930303-1)  
535
- 536 2. Kwon-Chung KJ, Fraser JA, Doering  
537 TL et al. Cryptococcus neoformans  
538 and Cryptococcus gattii, the etiologic  
539 agents of cryptococcosis. Cold Spring  
540 Harb Perspect Med. 2014; 4(7):  
541 a019760.  
542 [https://doi.org/10.1101%2Fcshperspect](https://doi.org/10.1101%2Fcshperspect.a019760)  
543 [.a019760](https://doi.org/10.1101%2Fcshperspect.a019760)  
544
- 545 3. Cogliati M, Esposto MC, Clarke DL,  
546 Wickes BL, Viviani MA. Origin of  
547 Cryptococcus neoformans var.  
548 neoformans diploid strains. J Clin  
549 Microbiol. 2001; 39(11): 3889-3894.  
550 [https://doi.org/10.1128%2Fjcm.39.11.3](https://doi.org/10.1128%2Fjcm.39.11.3889-3894.2001)  
551 [889-3894.2001](https://doi.org/10.1128%2Fjcm.39.11.3889-3894.2001)  
552
- 553 4. Khan ZU, Al-Anezi AA, Chandy R,  
554 Xu J. Disseminated cryptococcosis in  
555 an AIDS patient caused by a  
556 canavanine-resistant strain of  
557 Cryptococcus neoformans var. grubii. J  
558 Med Microbiol. 2003; 52(3): 271-275.  
559 [https://doi.org/10.1099%2Fjmm.0.050](https://doi.org/10.1099%2Fjmm.0.05097-0)  
560 [97-0](https://doi.org/10.1099%2Fjmm.0.05097-0)  
561
- 562 5. Firacative C, Trilles L, Meyer W.  
563 MALDI-TOF MS enables the rapid  
564 identification of the major molecular  
565 types within the Cryptococcus  
566 neoformans/C. gattii species complex.  
567 PloS one. 2012; 7(5): e37566.  
568 [https://doi.org/10.1371%2Fjournal.pon](https://doi.org/10.1371%2Fjournal.pone.0037566)  
569 [e.0037566](https://doi.org/10.1371%2Fjournal.pone.0037566)  
570
- 571 6. Sidrim JJC, Costa AK, Cordeiro RA et  
572 al. Molecular methods for the  
573 diagnosis and characterization of  
574 Cryptococcus: a review. Can J  
575 Microbiol. 2010; 56(6): 445-458.  
576 <https://doi.org/10.1139%2Fw10-030>  
577
- 578 7. Cherniak R, Jones RG, Reiss E.  
579 Structure determination of  
580 Cryptococcus neoformans serotype A-  
581 variant glucuronoxylomannan by <sup>13</sup>C-  
582 n.m.r. spectroscopy. Carbohydr Res.  
583 1988; 172(1): 113-138.  
584 [https://doi.org/10.1016%2Fs0008-](https://doi.org/10.1016%2Fs0008-6215%2800%2990846-2)  
585 [6215%2800%2990846-2](https://doi.org/10.1016%2Fs0008-6215%2800%2990846-2)
- 586 8. Van Wyk M, Govender NP, Mitchell  
587 TG, Litvintseva AP. Multilocus  
588 sequence typing of serially collected  
589 isolates of Cryptococcus from HIV-  
590 infected patients in South Africa. J  
591 Clin Microbiol. 2014; 52(6): 1921-31.  
592 [https://doi.org/10.1128%2Fjcm.03177-](https://doi.org/10.1128%2Fjcm.03177-13)  
593 [13](https://doi.org/10.1128%2Fjcm.03177-13)  
594
- 595 9. Govender NP, Meintjes G, Bicanic T  
596 et al. Guideline for the prevention,  
597 diagnosis, and management of  
598 cryptococcal meningitis among HIV-  
599 infected persons: 2013 update. S Afr J  
600 HIV Med. 2013; 14(2): 76-86.  
601 [https://doi.org/10.4102%2Fsajhivmed.](https://doi.org/10.4102%2Fsajhivmed.v14i2.82)  
602 [v14i2.82](https://doi.org/10.4102%2Fsajhivmed.v14i2.82)
- 603 10. Jarvis JN, Harrison TS, Lawn SD,  
604 Meintjes G, Wood R, Cleary S. Cost-  
605 effectiveness of cryptococcal antigen  
606 screening as a strategy to prevent HIV-  
607 associated cryptococcal meningitis in  
608 South Africa. PloS one. 2013; 8(7):  
609 e69288.  
610 [https://doi.org/10.1371%2Fjournal.pon](https://doi.org/10.1371%2Fjournal.pone.0069288)  
611 [e.0069288](https://doi.org/10.1371%2Fjournal.pone.0069288)
- 612 11. Loyse A, Wilson D, Meintjes G et al.  
613 Comparison of the early fungicidal  
614 activity of high-dose fluconazole,  
615 voriconazole, and flucytosine as  
616 second-line drugs given in  
617 combination with amphotericin B for  
618 the treatment of HIV-associated  
619 cryptococcal meningitis. Clin Infect  
620 Dis. 2011; 54(1):121-128.  
621 [https://doi.org/10.1093%2Fcid%2Fci7](https://doi.org/10.1093%2Fcid%2Fci745)  
622 [45](https://doi.org/10.1093%2Fcid%2Fci745)



- 627 12. Srinivasan A, Lopez-Ribot JL, 677 19. Matuschek E, Åhman J, Kahlmeter G,  
628 Ramasubramanian AK. Overcoming 678 Yagupsky P. Antimicrobial  
629 antifungal resistance. *Drug Discovery* 679 susceptibility testing of *Kingella*  
630 *Today: Technologies*. 2014; 11: 65-71. 680 *kingae* with broth microdilution and  
631 <https://doi.org/10.1016%2Fj.ddtec.201> 681 disk diffusion using EUCAST  
632 4.02.005 682 recommended media. *Clinical*  
633 683 *Microbiology and Infection*. Elsevier  
634 13. Park BJ, Wannemuehler KA, Marston 684 BV; 2018; 24(4): 396–401. Available  
635 BJ, Govender N, Pappas PG, Chiller 685 from:  
636 TM. Estimation of the current global 686 <http://dx.doi.org/10.1016/j.cmi.2017.0>  
637 burden of cryptococcal meningitis 687 7.019  
638 among persons living with HIV/AIDS. 688  
639 *AIDS*. 2009; 23(4): 525–530. 689 20. Loyse A, Thangaraj H, Easterbrook P  
640 <https://doi.org/10.1097%2Fqad.0b013e> 690 et al. Cryptococcal meningitis:  
641 328322ffac 691 improving access to essential  
642 692 antifungal medicines in resource-poor  
643 14. Pinalto K, Alspaugh J. New horizons 693 countries. *Lancet Infect Dis*. 2013;  
644 in antifungal therapy. *J Fungi*. 2016; 694 13(7):629-637.  
645 2(4): 26. 695 <https://doi.org/10.1016%2Fs1473->  
646 <https://doi.org/10.3390%2Fjof2040026> 696 3099%2813%2970078-1  
647 697  
648 15. Saag MS, Graybill RJ, Larsen RA et 698 21. Chayakulkeeree M, Perfect JR.  
649 al. Practice guidelines for the 699 Diagnosis of Cryptococcosis. *Infect*  
650 management of Cryptococcal disease. 700 *Dis Ther*. 2007; 47: 239.  
651 *Infectious Diseases Society of* 701 <https://doi.org/10.3109%2F978142001>  
652 *America. Clin Infect Dis*. 2000; 30(4): 702 7182.010  
653 710-718. 703  
654 <https://doi.org/10.1086%2F313757> 704 22. Chan MY, Tay ST. Enzymatic  
655 705 characterization of clinical isolates of  
656 16. Kanafani ZA, Perfect JR. 706 *Cryptococcus neoformans*,  
657 Antimicrobial resistance: resistance to 707 *Cryptococcus gattii*, and other  
658 antifungal agents: mechanisms and 708 environmental *Cryptococcus* spp.  
659 clinical impact. *Clin Infect Dis*. 2008; 709 *Mycoses*. Wiley; 2010; 53(1):26–31.  
660 46: 120-128. 710 Available from:  
661 <https://doi.org/10.1086%2F524071> 711 <http://dx.doi.org/10.1111/j.1439->  
662 712 0507.2008.01654.x  
663 17. Pfaller MA. Antifungal drug 713  
664 resistance: mechanisms, epidemiology, 714  
665 and consequences for treatment. *Am J* 715  
666 *Med*. 2012; 125(1): S3-S13. 716  
667 <https://doi.org/10.1016%2Fj.amjmed.2> 717  
668 011.11.001 718  
669 719  
670 18. Almeida F, Wolf JM, Casadevall A. 720  
671 Virulence-associated enzymes of 721  
672 *Cryptococcus neoformans*. *Eukaryot* 722  
673 *Cell*. 2015; 14(12): 1173-1185. 723  
674 <https://doi.org/10.1128%2Fec.00103-> 724  
675 15 725  
676 726  
24. Jorgensen JH, Hindler JF, Reller LB,  
Weinstein MP. New consensus  
guidelines from the Clinical and  
Laboratory Standards Institute for  
antimicrobial susceptibility testing of  
infrequently isolated or fastidious

- 727 bacteria. *Clin Infect Dis.* 2007; 44(2): 776  
728 280-286. 777  
729 <https://doi.org/10.1086%2F510431> 778  
730 779
- 731 25. Govender NP, Patel J, van Wyk M, 780  
732 Chiller TM, Lockhart SR. for the 781  
733 Group for Enteric, respiratory a 782  
734 meningeal disease surveillance in 783  
735 South Africa (GERMS-SA). Trends in 784  
736 antifungal drug susceptibility of 785  
737 *Cryptococcus neoformans* isolates 786  
738 obtained through population-based 787  
739 surveillance in South Africa in 2002- 788  
740 2003 and 2007-2008. *Antimicrob* 789  
741 *Agents Chemother.* 2011; 55(6): 2606– 790  
742 2611. 791  
743 <https://doi.org/10.1128%2Faac.00048-> 792  
744 11 793  
745 794
- 746 26. Meyne nee Haase N, Fuge G, Trieu 795  
747 HK, Zeng A-P, Jacob AF. 796  
748 Miniaturized Transmission-Line 797  
749 Sensor for Broadband Dielectric 798  
750 Characterization of Biological Liquids 799  
751 and Cell Suspensions. *IEEE* 800  
752 *Transactions on Microwave Theory* 801  
753 *and Techniques.* *IEEE*; 2015; 63(10): 802  
754 3026–3033. Available from: 803  
755 <http://dx.doi.org/10.1109/tmmt.2015.24> 804  
756 72009 805  
757 806
- 758 27. Yang Z, Pascon RC, Alspaugh A, Cox 807  
759 GM, McCusker JH. Molecular and 808  
760 genetic analysis of the *Cryptococcus* 809  
761 *neoformans* MET3 gene and a met3 810  
762 mutants. *Microbiology.* 2002; 811  
763 148(8):2617-2625. 812  
764 <https://doi.org/10.1099%2F00221287-> 813  
765 148-8-2617 814  
766 815
- 767 28. Saiki RK. Amplification of genomic 816  
768 DNA. PCR protocols: A guide to 817  
769 methods and applications. 1990; 2:13- 818  
770 20. <https://doi.org/10.1016%2Fb978-0-> 819  
771 12-372180-8.50006-8 820  
772 821
- 773 29. Peman J, Canton E, Espinel-Ingroff A. 822  
774 Antifungal drug resistance 823  
775 mechanisms. *Expert Rev Anti Infect* 824  
825
- Ther. 2009; 7(4):453-460.  
<https://doi.org/10.1586%2Feri.09.18>
30. Pfaller MA, Messer SA, Boyken L et al. Global trends in the antifungal susceptibility of *Cryptococcus neoformans* (1990 to 2004). *J Clin Microbiol.* 2005; 43(5):2163-7. <https://doi.org/10.1128%2Fjcm.43.5.2163-2167.2005>
31. Pfaller MA, Castanheira M, Messer SA, Moet GJ, Jones RN. Variation in *Candida* spp. distribution and antifungal resistance rates among bloodstream infection isolate by patient age: report from the SENTRY Antimicrobial Surveillance Program (2008–2009). *Diagn Microbiol Infect Dis.* 2010; 68(3):278-283. <https://doi.org/10.1016%2Fj.diagmicrobio.2010.06.015>
32. Arsic Arsenijevic V, Pekmezovic MG, Meis JF, Hagen F. Molecular epidemiology and antifungal susceptibility of Serbian *Cryptococcus neoformans* isolates. *Mycoses.* 2014; 57(6):380-387. <https://doi.org/10.1111%2Fmyc.12171>
33. Favalessa OC, de Paula DA, Dutra V et al. Molecular typing and in vitro antifungal susceptibility of *Cryptococcus* spp from patients in Midwest Brazil. *J Infect Dev Ctries.* 2014; 8(8): 1037-1043. <https://doi.org/10.3855%2Fjidc.4446>
34. Lugarini C, Goebel CS, Condas LA et al. *Cryptococcus neoformans* isolated from Passerine and Psittacine bird excreta in the state of Paraná, Brazil. *Mycopathologia.* 2008; 166(2): 61-69. <https://doi.org/10.1007%2Fs11046-008-9122-3>
35. Khayhan K, Hagen F, Pan W, et al. Geographically structured populations of *Cryptococcus neoformans* Variety

- 826 grubii in Asia correlate with HIV 844 Genetic diversity and genomic  
 827 status and show a clonal population 845 plasticity of *Cryptococcus neoformans*  
 828 structure. PLoS One. 2013; 8(9): 846 AD hybrid strains. G3: Genes,  
 829 e72222. 847 Genomes, Genetics. 2012; 2(1):83-97.  
 830 <https://doi.org/10.1371%2Fjournal.pon> 848 <https://doi.org/10.1534%2Fg3.111.001>  
 831 e.0072222 849 255  
 832 850  
 833 36. Litvintseva AP, Carbone I, Rossouw J, 851 38. Feretzaki M, Hardison SE, Wormley Jr  
 834 Thakur R, Govender NP, Mitchell T.G. 852 FL, Heitman J. *Cryptococcus*  
 835 Evidence that the human pathogenic 853 *neoformans* hyperfilamentous strain is  
 836 fungus *Cryptococcus neoformans* var. 854 hypervirulent in a murine model of  
 837 *grubii* may have evolved in Africa. 855 cryptococcal meningoencephalitis.  
 838 PLoS ONE. 2011; 6(5): e19688. 856 PloS one. 2014; 9(8):e104432.  
 839 <https://doi.org/10.1371%2Fjournal.pon> 857 <https://doi.org/10.1534%2Fg3.111.001>  
 840 e.0019688 858 255  
 841 859  
 842 37. Li W, Averette AF, Desnos-Ollivier  
 843 M, Ni M, Dromer F, Heitman J.

860

861 **Table 3: Combination and sequences of the primers used for the determination of**  
 862 **serotype and mating type of *C. neoformans* by PCR multiplex alpha-Aa-D and a-**  
 863 **Aalpha-D (N= 50)**  
 864

| Gene alleles                               | Primers                | Sequence 5'3'                                         | PCR product - (bp) |
|--------------------------------------------|------------------------|-------------------------------------------------------|--------------------|
| <i>MAT</i> $\alpha$<br>serotype-A<br>(MM1) | JOHE 7264<br>JOHE 7265 | AGCTGATGCTGTGGATTGAATAC<br>GTTCAATTAATCTCACTACCTGTAG  | 1200               |
| <i>MAT</i> $\alpha$<br>serotype D<br>(MM1) | JOHE 7273<br>JOHE 7275 | GTTTCATCAGATACAGAGGAGTGG<br>CTCCACTGTCAAACCTACGGC     | 870                |
| <i>MAT</i> $\alpha$<br>serotype A<br>(MM2) | JOHE 7270<br>JOHE 7272 | ATCAGAGACAGAGGAGGAGCAAGAC<br>TCCACTGGCAACCCTGCGAG     | 870                |
| <i>MAT</i> $\alpha$<br>serotype D<br>(MM2) | JOHE 7267<br>JOHE 7268 | ATAGGCTGGTGTGCTGTGAATTAAG<br>GTTCAAGTAATCTCACTACATGCG | 1200               |

865

866 **Table 4: MIC's of the isolates against common antifungals (N= 50)**  
 867

| Antifungal drugs | Interpretation | MIC scales              | Isolates numbers |
|------------------|----------------|-------------------------|------------------|
| **Fluconazole    | Susceptible    | $\leq 2 \mu\text{g/mL}$ | 13 (26%)         |
|                  | Intermediate   | $4 \mu\text{g/mL}$      | 12 (24%)         |
|                  | Resistant      | $\geq 8 \mu\text{g/mL}$ | 25 (50%)         |

|                 |              |                                            |           |
|-----------------|--------------|--------------------------------------------|-----------|
| **Voriconazole  | Susceptible  | $\leq 0.12 \mu\text{g/mL}$                 | 50 (100%) |
|                 | Intermediate | $0.25 \mu\text{g/mL} - 0.5 \mu\text{g/mL}$ | 0         |
|                 | Resistant    | $\geq 1 \mu\text{g/mL}$                    | 0         |
| *Amphotericin-B | Susceptible  | $\leq 0.5 \mu\text{g/mL}$                  | 50 (100%) |
|                 | Intermediate | -                                          | 0         |
|                 | Resistant    | $\geq 2 \mu\text{g/mL}$                    | 0         |

868 \*interpretation according to NCCLS M27-A document 2000

869 \*\*interpretation according to CLSI M27-A document 2013

870

871

872

873

874

875

876

877

878

879

880

881

882

883

884

885

886

887

888

889

890
